# Supplementary material
Source: PubMed Central journal article supplement (PMC5278763)
Supplement: NIHMS838543-supplement-Suppl_15.pdf [file NIHMS838543-supplement-Suppl_15.pdf]

**Table S1 - Viral injections for functional studies in the strain of VGat-cre. Related to STAR methods.**

| Mouse strain                                                         | VGat-Cre                                                             |                                      |                            |            |            |                             |                          |            |
|----------------------------------------------------------------------|----------------------------------------------------------------------|--------------------------------------|----------------------------|------------|------------|-----------------------------|--------------------------|------------|
| Injection type                                                       | Viral construct                                                      | Volume (μL/side), (Rate: 0.1 μL/min) | Injection Coordinates (mm) |            |            | Opto fiber Coordinates (mm) |                          |            |
|                                                                      |                                                                      |                                      | AP                         | ML         | DV         | AP                          | ML                       | DV         |
| CeA-ChR2                                                             | AAV5-EF1a-DIO-hChR2(H134R)-EYFP                                      | 0.5                                  | -1.0                       | ±2.5       | -5.0       | -1.0                        | ±2.5                     | -4.5       |
| CeA-eArch                                                            | AAV5-EF1a-DIO-eArch3.0-EYFP                                          | 0.5                                  | -1.0                       | ±2.5       | -5.0       | -1.0                        | ±2.5                     | -4.5       |
| CeA-EYFP                                                             | AAV5-EF1a-DIO-EYFP                                                   | 0.5                                  | -1.0                       | ±2.5       | -5.0       | -1.0                        | ±2.5                     | -4.5       |
| CeA-Gq                                                               | AAV5-hSyn-DIO-hM3D(Gq)-mCherry                                       | 0.5                                  | -1.0                       | ±2.5       | -5.0       | N/A                         |                          |            |
| CeA-Gi                                                               | AAV5-hSyn-DIO-hM4D(Gi)-mCherry                                       | 0.5                                  | -1.0                       | ±2.5       | -5.0       | N/A                         |                          |            |
| Caudal Striatum - ChR2                                               | AAV5-EF1a-DIO-hChR2(H134R)-EYFP                                      | 0.5                                  | -0.9                       | ±3.0       | -4.2       | -1.0                        | ±2.5                     | -3.8       |
| Globus pallidus-ChR2                                                 | AAV5-EF1a-DIO-hChR2(H134R)-EYFP                                      | 0.5                                  | -1.0                       | ±2.25      | -4.0       | -1.0                        | ±2.25                    | -3.5       |
| CeA-ChR2, opto fibers in PCRt                                        | AAV5-EF1a-DIO-hChR2(H134R)-EYFP                                      | 0.5                                  | -1.0                       | ±2.5       | -5.0       | -6.1                        | ±1.5                     | -4.5       |
| CeA-ChR2, opto fibers in CeA; depolarizing designer receptor in PCRt | AAV5-EF1a-DIO-hChR2(H134R)-EYFP; AAV5-hSyn-DIO-hM3D(Gq)-mCherry      | 0.5; 0.5                             | -1.0; -6.1                 | ±2.5; ±1.5 | -5.0; -5.4 | -1.0                        | ±2.5                     | -4.5       |
| CeA-ChR2, opto fibers in CeA; Cre-dependent Caspase in PCRt          | AAV5-EF1a-DIO-hChR2(H134R)-EYFP; AAV5-flex-taCasp3-TEVp              | 0.5; 0.5                             | -1.0; -6.1                 | ±2.5; ±1.5 | -5.0; -5.4 | -1.0                        | ±2.5                     | -4.5       |
| PCRt-ChR2                                                            | AAV5-EF1a-DIO-hChR2(H134R)-EYFP                                      | 0.5                                  | -6.1                       | ±1.5       | -5.4       | -6.1                        | ±1.5                     | -4.5       |
| PCRt-eArch                                                           | AAV5-EF1a-DIO-eArch3.0-EYFP                                          | 0.5                                  | -6.1                       | ±1.5       | -5.4       | -6.1                        | ±1.5                     | -4.5       |
| CeA-ChR2, opto fibers in PAG                                         | AAV5-EF1a-DIO-hChR2(H134R)-EYFP                                      | 0.5                                  | -1.0                       | ±2.5       | -5.0       | -4.4                        | ±0.5                     | -2.0       |
| CeA-ChR2, opto fibers in CeA; depolarizing designer receptor in PAG  | AAV5-hSyn-hChR2(H134R)-EYFP; AAV5-hSyn-DIO-hM3D(Gq)-mCherry          | 0.5; 0.3                             | -1.0; -4.4                 | ±2.5; ±0.5 | -5.0; -5.4 | -1.0                        | ±2.5                     | -4.5       |
| CeA-ChR2, opto fibers in PAG; depolarizing designer receptor in MLR  | AAV5-EF1a-DIO-hChR2(H134R)-EYFP; AAV5-hSyn-HA-hM3D(Gq)-IRES-mCitrine | 0.5; 0.3                             | -1.0; -5.0                 | ±2.5; ±1.2 | -5.0; -5.4 | -4.4                        | ±0.5                     | -2.0       |
| CeA-ChR2, opto fibers in PCRt + PAG                                  | AAV5-EF1a-DIO-hChR2(H134R)-EYFP                                      | 0.5                                  | -1.0                       | ±2.5       | -5.0       | -6.1; -4.4                  | L/R -1.5/1.9*; -0.5/0.7* | -4.5; -2.0 |

\*Right side: tilting to the right 6 °

**Table S2 - Viral injections for functional studies in the strain of VGat-floxed. Related to STAR methods.**

| Mouse strain                    | VGat-floxed                                                   |                                        |                            |      |      |                             |      |      |
|---------------------------------|---------------------------------------------------------------|----------------------------------------|----------------------------|------|------|-----------------------------|------|------|
| Injection type                  | Viral construct                                               | Volume (μL/side)<br>(Rate: 0.1 μL/min) | Injection Coordinates (mm) |      |      | Opto fiber Coordinates (mm) |      |      |
|                                 |                                                               |                                        | AP                         | ML   | DV   | AP                          | ML   | DV   |
| +CRE ( <i>CeA-ChR2+Cre</i> )    | AAV5-hSyn-hChR2(H134R)-EYFP:<br>AAV5-CMV-Cre-GFP. Mixed [1:1] | 0.5                                    | -1.0                       | ±2.5 | -5.0 | -1.0                        | ±2.5 | -4.5 |
| CONTROL ( <i>CeA-ChR2+GFP</i> ) | AAV5-hSyn-hChR2(H134R)-EYFP:<br>AAV5-CMV-GFP. Mixed [1:1]     | 0.5                                    | -1.0                       | ±2.5 | -5.0 | -1.0                        | ±2.5 | -4.5 |

**Table S3 - Viral injections for functional studies in the strain of VGlut2-cre. Related to STAR methods.**

| Mouse strain                                                               | VGlut2-Cre                                                     |                                        |                            |               |               |                             |      |      |
|----------------------------------------------------------------------------|----------------------------------------------------------------|----------------------------------------|----------------------------|---------------|---------------|-----------------------------|------|------|
| Injection type                                                             | Viral construct                                                | Volume (μL/side)<br>(Rate: 0.1 μL/min) | Injection Coordinates (mm) |               |               | Opto fiber Coordinates (mm) |      |      |
|                                                                            |                                                                |                                        | AP                         | ML            | DV            | AP                          | ML   | DV   |
| <i>CeA-ChR2, opto fibers in CeA; Cre-dependent Caspase in PCRt</i>         | AAV5-EF1a-DIO-hChR2(H134R)-EYFP;<br>AAV5-flex-taCasp3-TEVp     | 0.5;<br>0.5                            | -1.0;<br>-6.1              | ±2.5;<br>±1.5 | -5.0;<br>-5.4 | -1.0                        | ±2.5 | -4.5 |
| <i>PCRt-ChR2</i>                                                           | AAV5-EF1a-DIO-hChR2(H134R)-EYFP                                | 0.5                                    | -6.1                       | ±1.5          | -5.4          | -6.1                        | ±1.5 | -4.5 |
| <i>CeA-ChR2, opto fibers in CeA; depolarizing designer receptor in PAG</i> | AAV5-hSyn-hChR2(H134R)-EYFP;<br>AAV5-hSyn-DIO-hM3D(Gq)-mCherry | 0.5;<br>0.3                            | -1.0;<br>-4.4              | ±2.5;<br>±0.5 | -5.0;<br>-5.4 | -1.0                        | ±2.5 | -4.5 |
| <i>PAG-ChR2, opto fibers in MLR</i>                                        | AAV5-EF1a-DIO-hChR2(H134R)-EYFP                                | 0.3                                    | -4.4                       | ±0.5          | -2.7          | -5.0                        | ±1.2 | -3.0 |

**Table S4 - Viral injections for functional studies in the strain of C57BL6/J. Related to STAR methods.**

| <u>Mouse strain</u>                                                                 | <b>C57BL6/J</b>                                                        |                                        |                            |                        |                        |                             |      |      |
|-------------------------------------------------------------------------------------|------------------------------------------------------------------------|----------------------------------------|----------------------------|------------------------|------------------------|-----------------------------|------|------|
| <u>Injection type</u>                                                               | <u>Viral construct</u>                                                 | Volume (µL/side)<br>(Rate: 0.1 µL/min) | Injection Coordinates (mm) |                        |                        | Opto fiber Coordinates (mm) |      |      |
|                                                                                     |                                                                        |                                        | AP                         | ML                     | DV                     | AP                          | ML   | DV   |
| <i>PCRt CAV2-Cre; Cre-dependent ChR2 in CeA and opto fiber in CeA</i>               | CAV2-Cre-GFP; AAV5-EF1a-DIO-hChR2(H134R)-mCherry-WPRA-pA               | 0.5;<br>0.5                            | -6.1;<br>-1.0              | ±1.5;<br>±2.5          | -5.0;<br>-5.4          | -1.0                        | ±2.5 | -4.5 |
| <i>PAG CAV2-Cre; Cre-dependent ChR2 in CeA and opto fiber in CeA</i>                | CAV2-Cre-GFP; AAV5-EF1a-DIO-hChR2(H134R)-mCherry-WPRA-pA               | 0.3;<br>0.5                            | -4.4;<br>-1.0              | ±0.5;<br>±2.5          | -2.7;<br>-5.0          | -1.0                        | ±2.5 | -4.5 |
| <i>PCRt CAV2-Cre; PAG CAV2-Cre; Cre-dependent ChR2 in CeA and opto fiber in CeA</i> | CAV2-Cre-GFP; CAV2-Cre-GFP; AAV5-EF1a-DIO-hChR2(H134R)-mCherry-WPRA-pA | 0.5;<br>0.3;<br>0.5                    | -6.1;<br>-4.4;<br>-1.0     | ±1.5;<br>±0.5;<br>±2.5 | -5.4;<br>-2.7;<br>-5.0 | -1.0                        | ±2.5 | -4.5 |
| <i>PCRt CAV2-Cre; Cre-dependent Caspase in CeA</i>                                  | CAV2-Cre-GFP; AAV5-flex-taCasp3-TEVp                                   | 0.5;<br>0.5                            | -6.1;<br>-1.0              | ±1.5;<br>±2.5          | -5.4;<br>-5.0          | N/A                         |      |      |
| <i>PAG CAV2-Cre; Cre-dependent Caspase in CeA</i>                                   | CAV2-Cre-GFP; AAV5-flex-taCasp3-TEVp                                   | 0.3;<br>0.5                            | -4.4;<br>-1.0              | ±0.5;<br>±2.5          | -2.7;<br>-5.0          | N/A                         |      |      |

**Table S5 - Caspase efficiency studies for PCRt lesions in the strains of VGat-cre and VGlut2-cre. Related to STAR methods.**

| <u>Mouse strains</u>                 | <b><i>VGat-Cre and VGlut2-Cre</i></b>                                                       | Volume                                       | Injection Coordinates (mm) |      |      |
|--------------------------------------|---------------------------------------------------------------------------------------------|----------------------------------------------|----------------------------|------|------|
| <u>Injection type</u>                | <u>Viral construct</u>                                                                      | Volume (µL) unilateral<br>(Rate: 0.1 µL/min) | AP                         | ML   | DV   |
| <i>PCRt-ChR2; PCR-ChR2 + Caspase</i> | AAV5-EF1a-DIO-hChR2(H134R)-EYFP; AAV5-DIO-ChR2-EYFP and AAV5-flex-taCasp3-TEVp. Mixed [1:1] | 0.5;<br>0.5                                  | -6.1                       | ±1.5 | -5.4 |

**Table S6 - Rabies injections for anatomical studies. Related to STAR methods.**

| <b>Retrograde tracing using Cre-dependent pseudo-typed rabies virus expression</b> |                                                                         |                                           |      |                            |      |  |
|------------------------------------------------------------------------------------|-------------------------------------------------------------------------|-------------------------------------------|------|----------------------------|------|--|
| Mouse strains                                                                      | <b>VGat-Cre and VGlut2-Cre</b>                                          |                                           |      | Injection Coordinates (mm) |      |  |
| Injection type                                                                     | Viral construct                                                         | Volume (µL) unilateral (Rate: 0.1 µL/min) | AP   | ML                         | DV   |  |
| <i>PCRt retrograde tracing</i>                                                     | AAV5-CA-FLEX-RG and AAV5-EF1a-FLEX-TVA-mCherry Mixed [1:1]; SAD-ΔG-GFP* | 0.5; 0.5                                  | -6.1 | ±1.5                       | -4.5 |  |
| <i>PAG retrograde tracing</i>                                                      | AAV5-CA-FLEX-RG and AAV5-EF1a-FLEX-TVA-mCherry Mixed [1:1]; SAD-ΔG-GFP* | 0.5; 0.5                                  | -4.4 | ±0.5                       | -2.0 |  |

\* SAD-ΔG-GFP was injected 2 weeks after the first viral injection

**Table S7 - AAVs injections for anatomical studies. Related to STAR methods.**

| <b>Anatomical tracing studies</b> |                                          |                                                       |                                           |           |            |            |                                                                             |      |      |
|-----------------------------------|------------------------------------------|-------------------------------------------------------|-------------------------------------------|-----------|------------|------------|-----------------------------------------------------------------------------|------|------|
| Mouse strain                      | Injection type                           | Viral construct                                       | Viral Injection Coordinates (mm)          |           |            |            | FluoroGold Injections                                                       |      |      |
|                                   |                                          |                                                       | Volume (µL) unilateral (Rate: 0.1 µL/min) | AP        | ML         | DV         | AP                                                                          | ML   | DV   |
| <b>VGat-Cre</b>                   | <i>CeA-SynB; PCRt-mCherry</i>            | <i>AAV5-EF1a-DIO-Synb-eGFP; AAV5-hSyn-DIO-mCherry</i> | 0.5; 0.5                                  | -1.0; 6.1 | ±2.5; ±1.5 | -5.0; -5.4 | N/A                                                                         |      |      |
| <b>VGat-Cre/ VGlut2-cre</b>       | <i>PCRt-SynB; FluoroGold in muscle</i>   | <i>AAV5-EF1a-DIO-Synb-eGFP</i>                        | 0.5                                       | -6.1      | ±1.5       | -5.4       | In either Masseter or Trapezius with 1% FG. 10µL unilateral; rate 0.5µL/min |      |      |
| <b>VGlut2-Cre</b>                 | <i>VL/LPAG-SynB; FluoroGold in MLR**</i> | <i>AAV5-EF1a-DIO-Synb-eGFP</i>                        | 0.3                                       | -4.4      | ±0.5       | -2.7       | -5.0                                                                        | ±1.2 | -3.4 |

\*\*1%FG injected at rate of 0.05µL/20min

**Table S8 - Retrograde tracer injections for anatomical studies. Related to STAR methods.**

| <b>Dual retrograde labeling from PCRt and PAG</b>       |                 |                        |                            |       |       |               |
|---------------------------------------------------------|-----------------|------------------------|----------------------------|-------|-------|---------------|
| Mouse strain                                            | <b>C57BL6/J</b> |                        | Injection Coordinates (mm) |       |       |               |
| Injection type                                          | Retrograde dye  | Volume (µL) unilateral | AP                         | ML    | DV    | Rate          |
| FluoroGold (FG) in PCRt ; Cholera Toxin subunit B (CTb) | 1% FG;          | 0.05;                  | -6.1;                      | ±1.5; | -5.5; | 0.05µL/20min; |
|                                                         | 1% CTb          | 0.5                    | -4.4                       | ±0.5  | -2.7  | 0.5µL/20min.  |
